# Supplementary material for: Molecular basis of signaling specificity between GIRK channels and GPCRs
Source: eLife journal article supplement (doi:10.7554/elife.42908), 2018-12-10
Supplement: supp [file elife-42908-supp-v1.zip]

Archive with 8 entries (8 files):
- elife_poa_e42908_Figure_3_figure_supplement_1.jpg
- elife_poa_e42908_Figure_7_figure_supplement_1.jpg
- elife_poa_e42908_Figure_6_figure_supplement_1.jpg
- elife_poa_e42908_Figure_5_figure_supplement_1.jpg
- elife_poa_e42908_Transparent_Reporting_File.pdf
- elife_poa_e42908_Figure_3_figure_supplement_2.jpg
- elife_poa_e42908_Figure_6_figure_supplement_2.jpg
- elife_poa_e42908_Figure_1_figure_supplement_1.jpg
