# Supplementary figures and images for: Molecular basis of signaling specificity between GIRK channels and GPCRs
Source: eLife journal article supplement (doi:10.7554/elife.42908), 2018-12-10

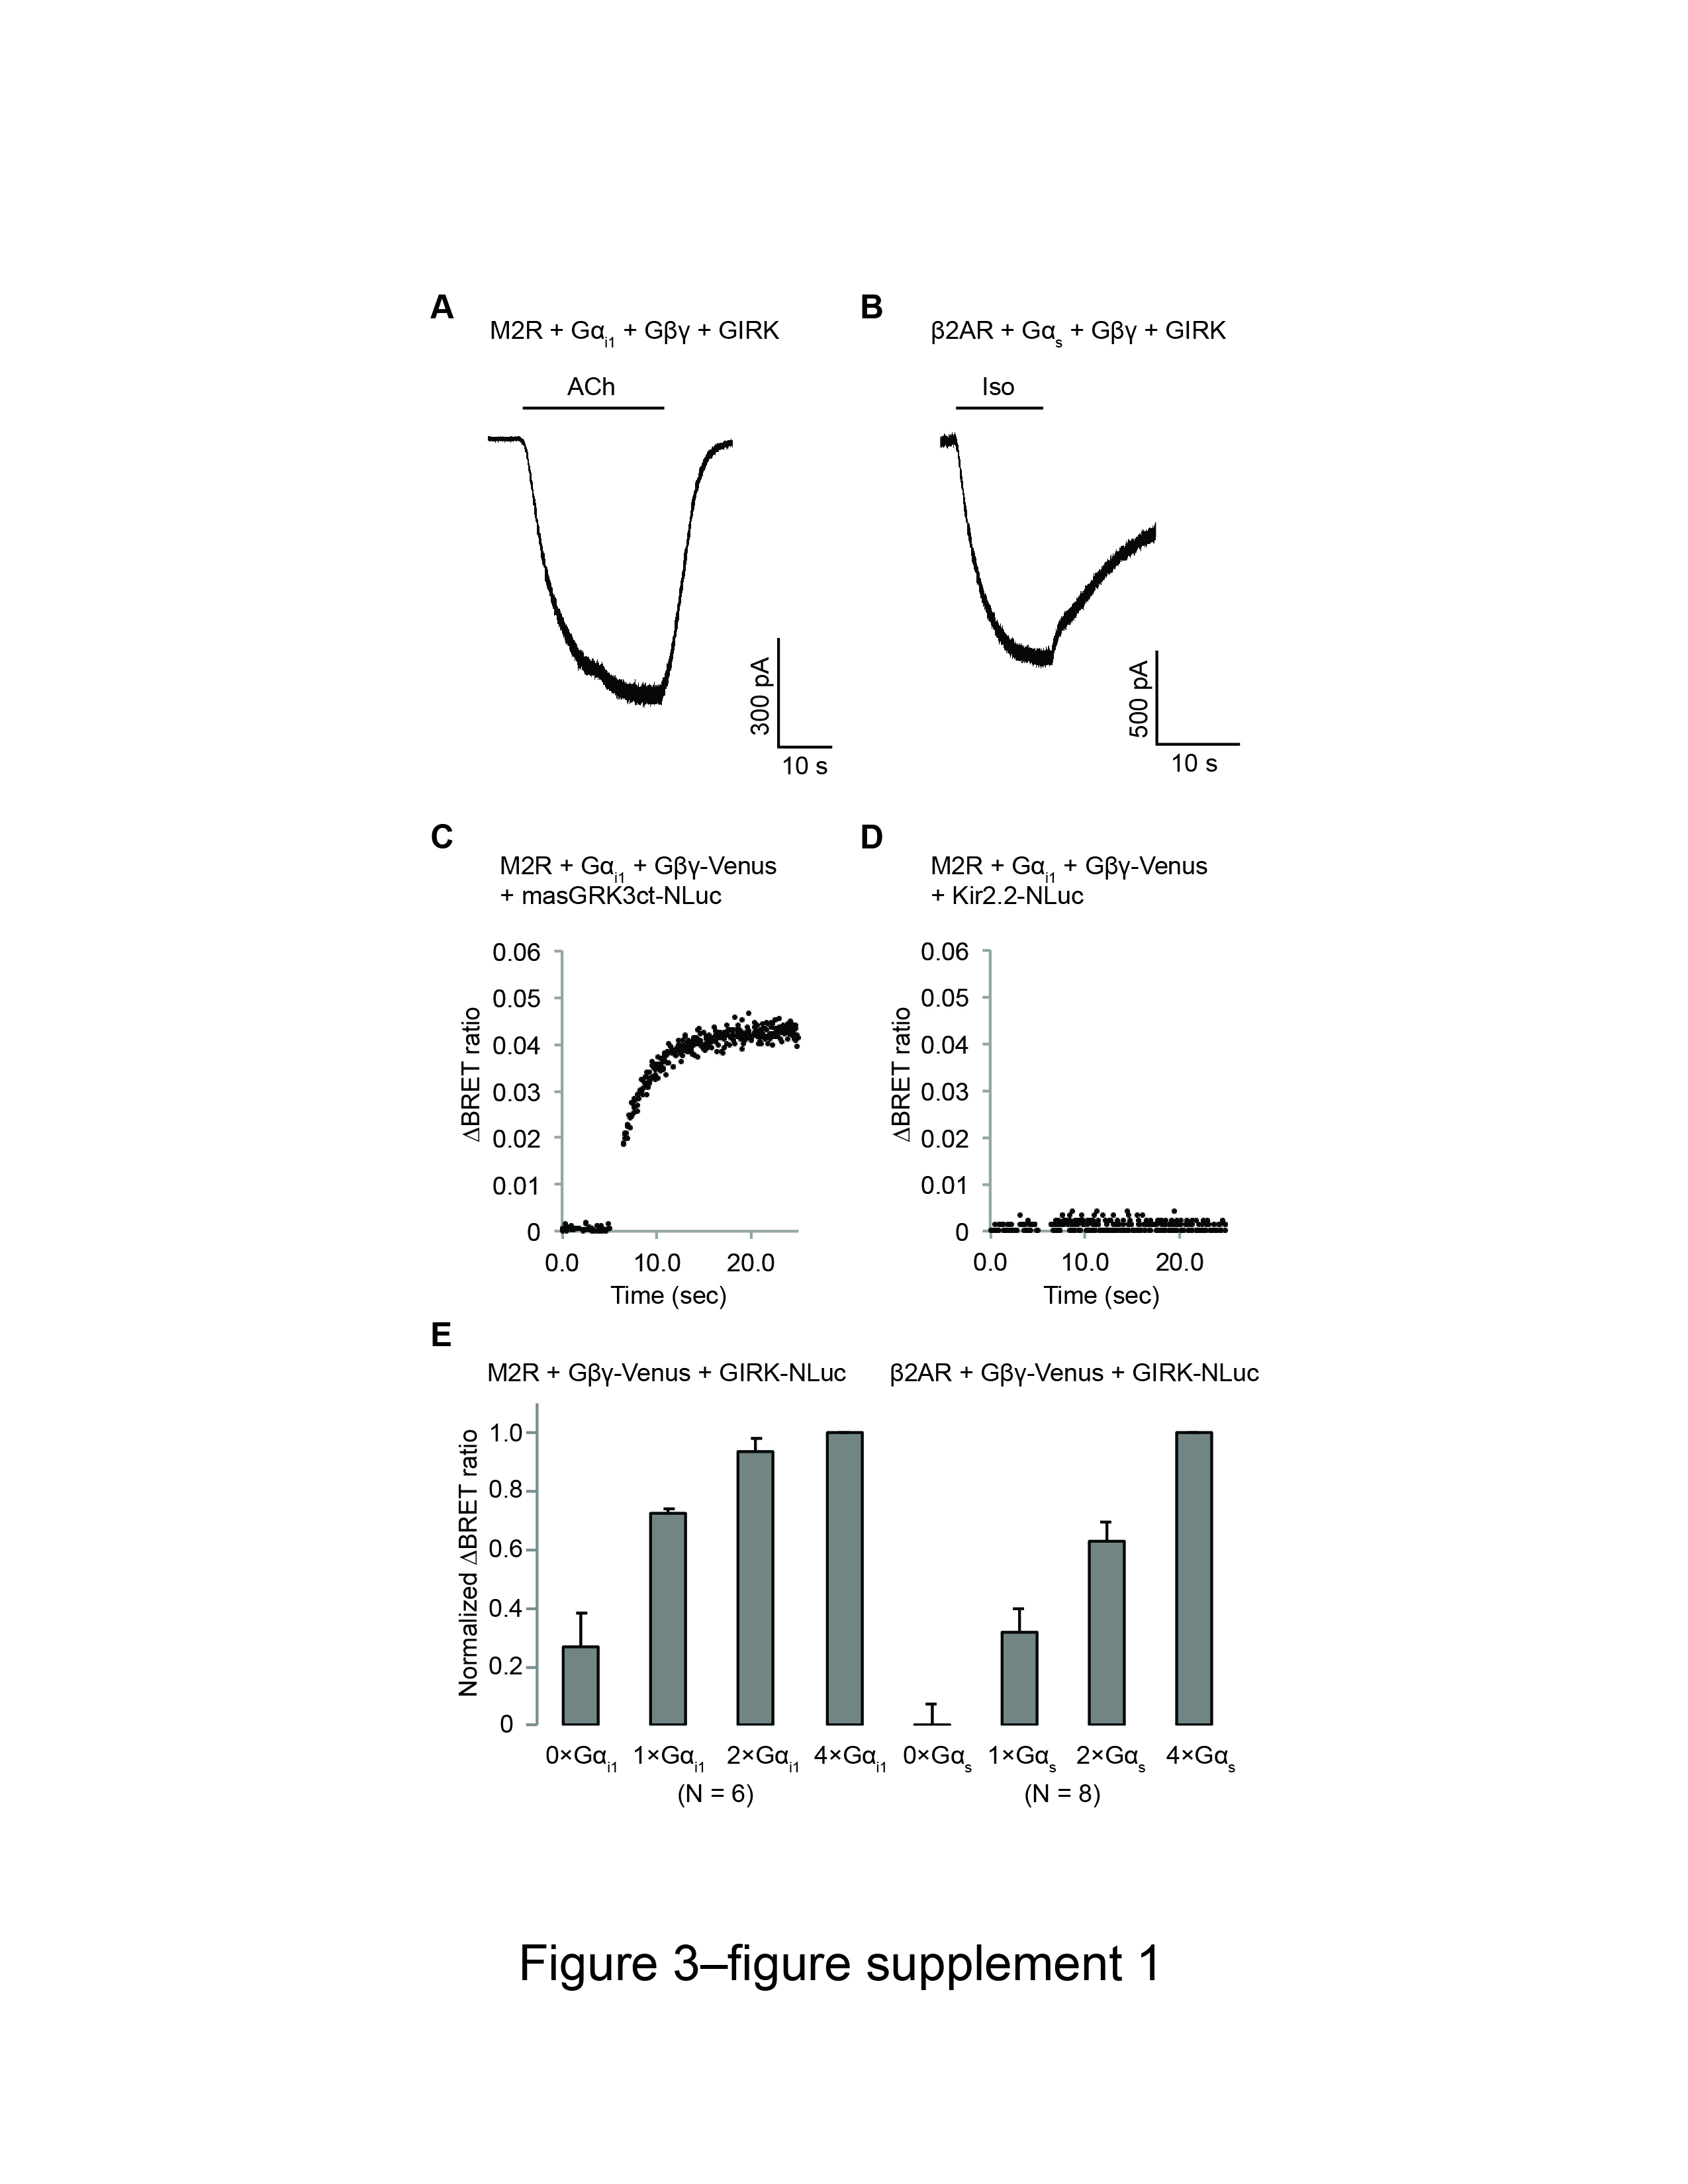

Supplement: supp [file elife-42908-supp-v1.zip › elife_poa_e42908_Figure_3_figure_supplement_1.jpg]

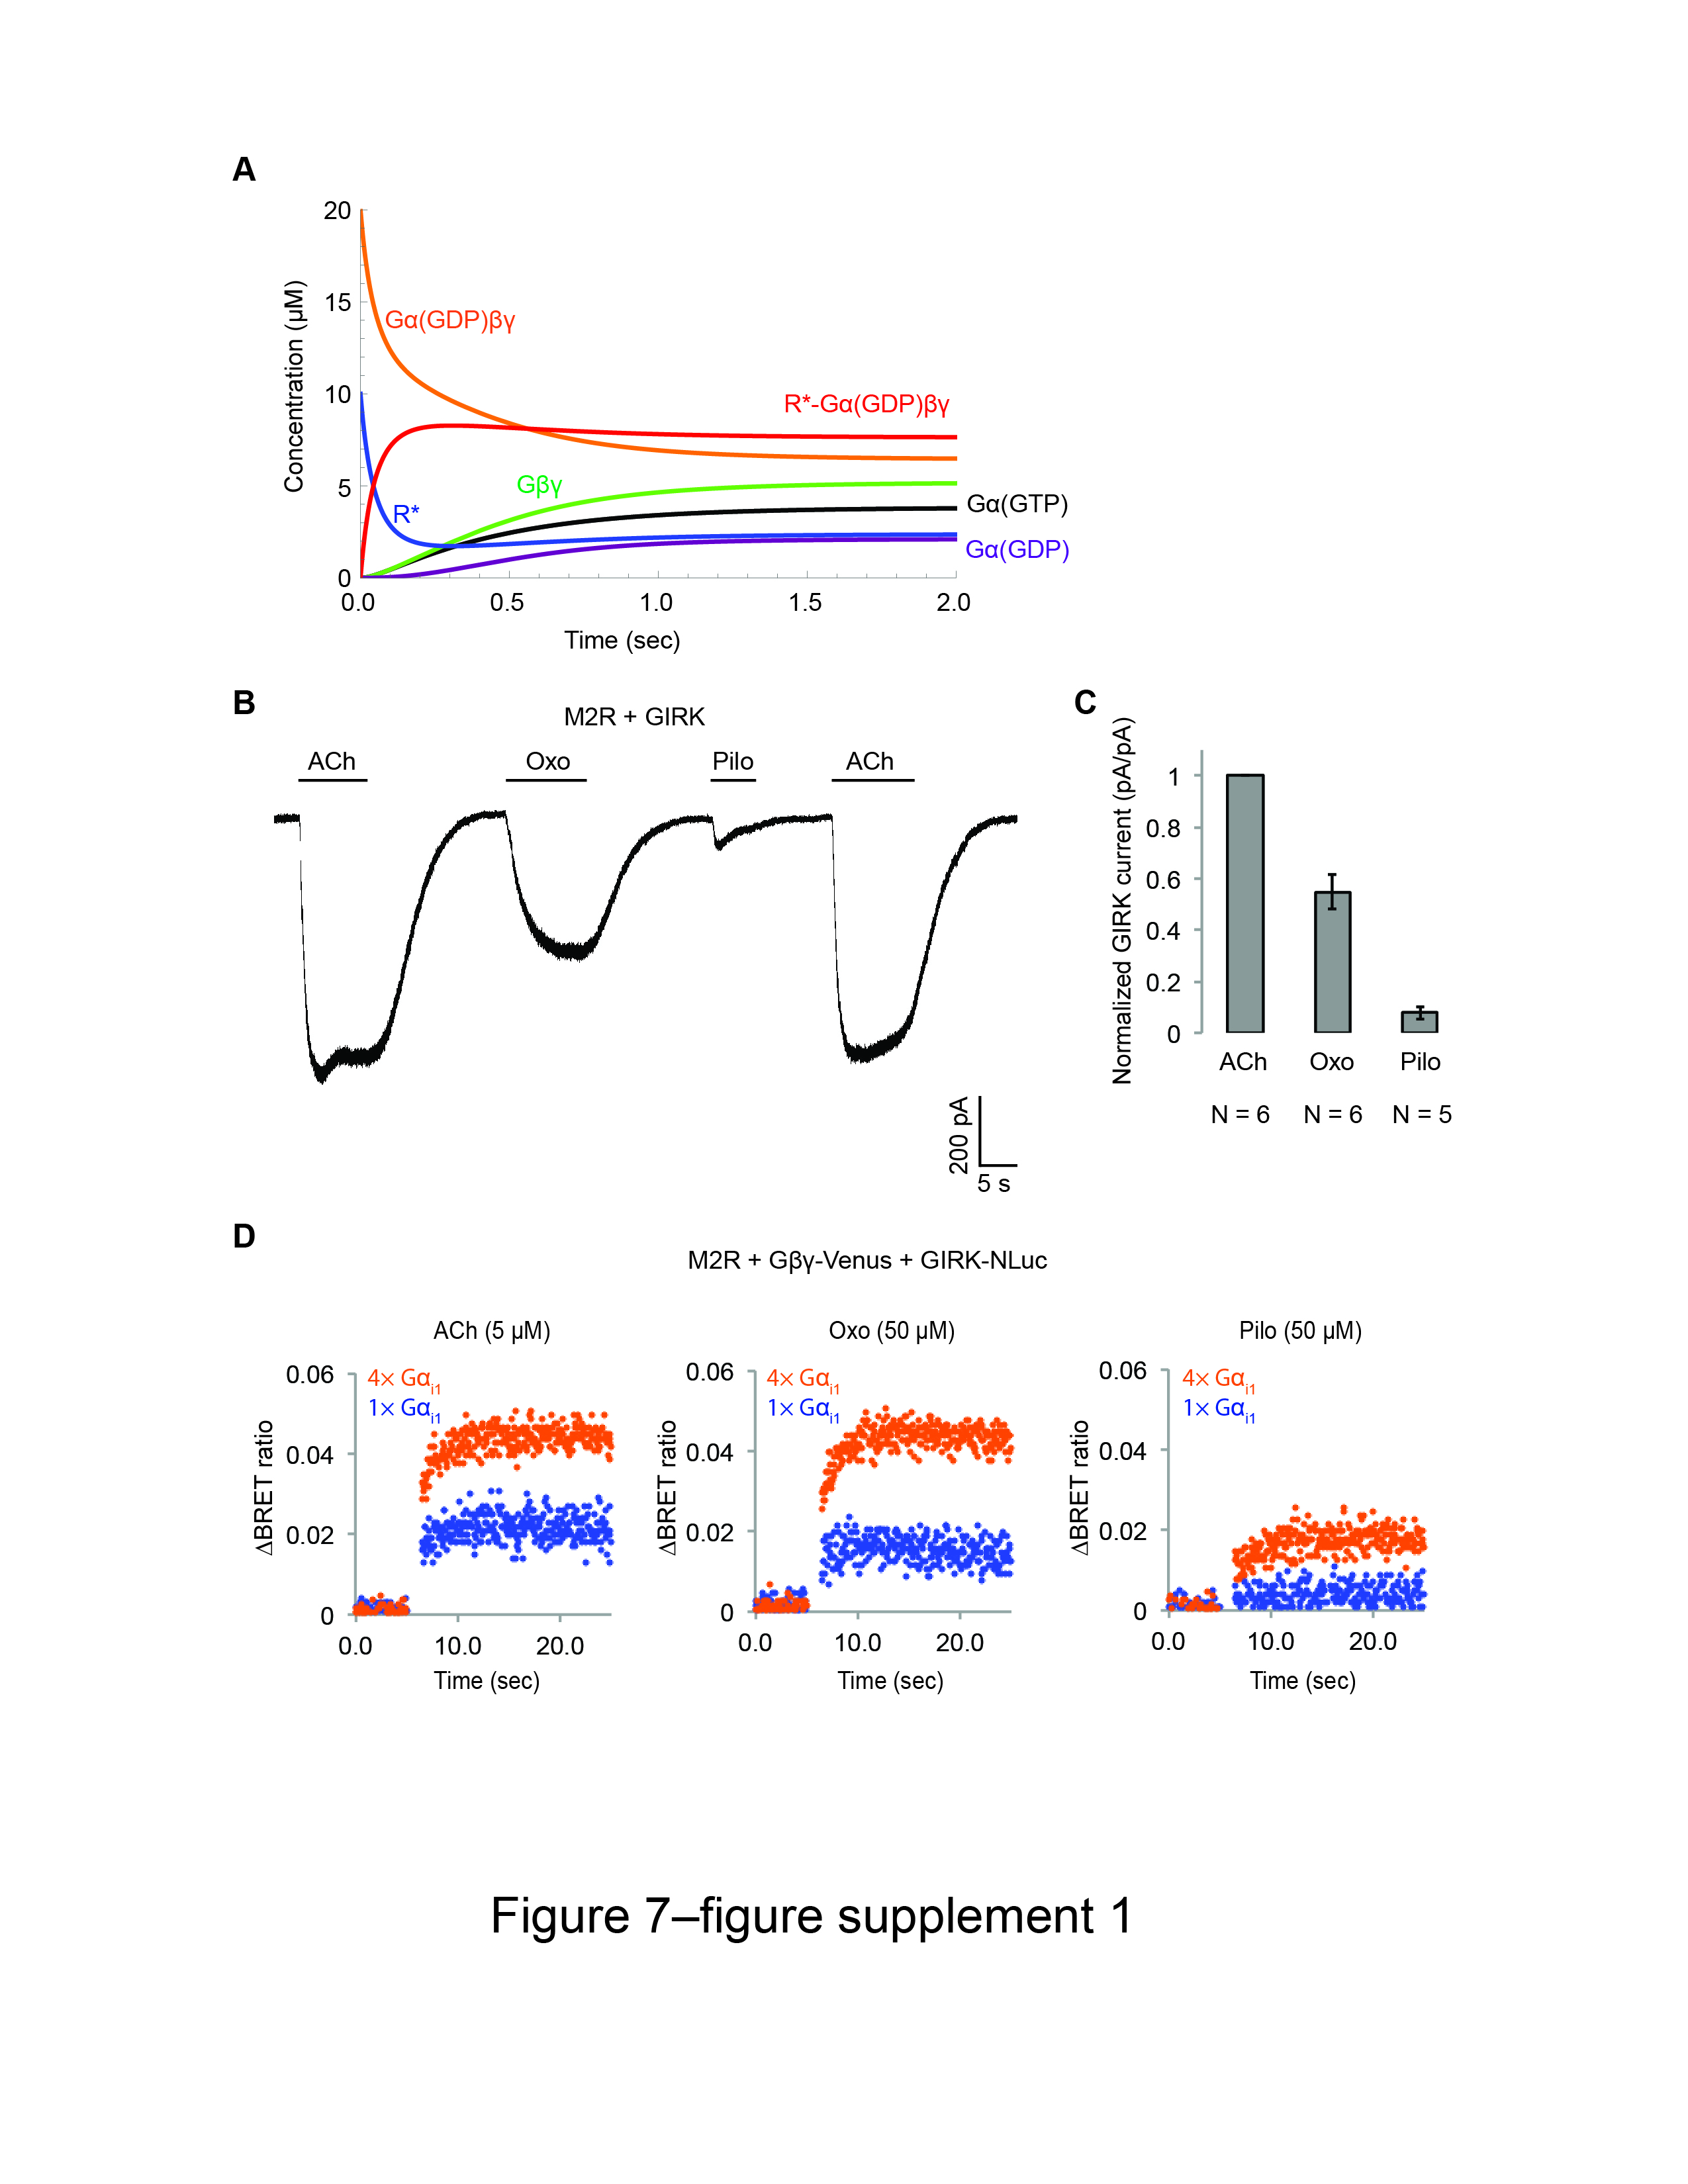

Supplement: supp [file elife-42908-supp-v1.zip › elife_poa_e42908_Figure_7_figure_supplement_1.jpg]

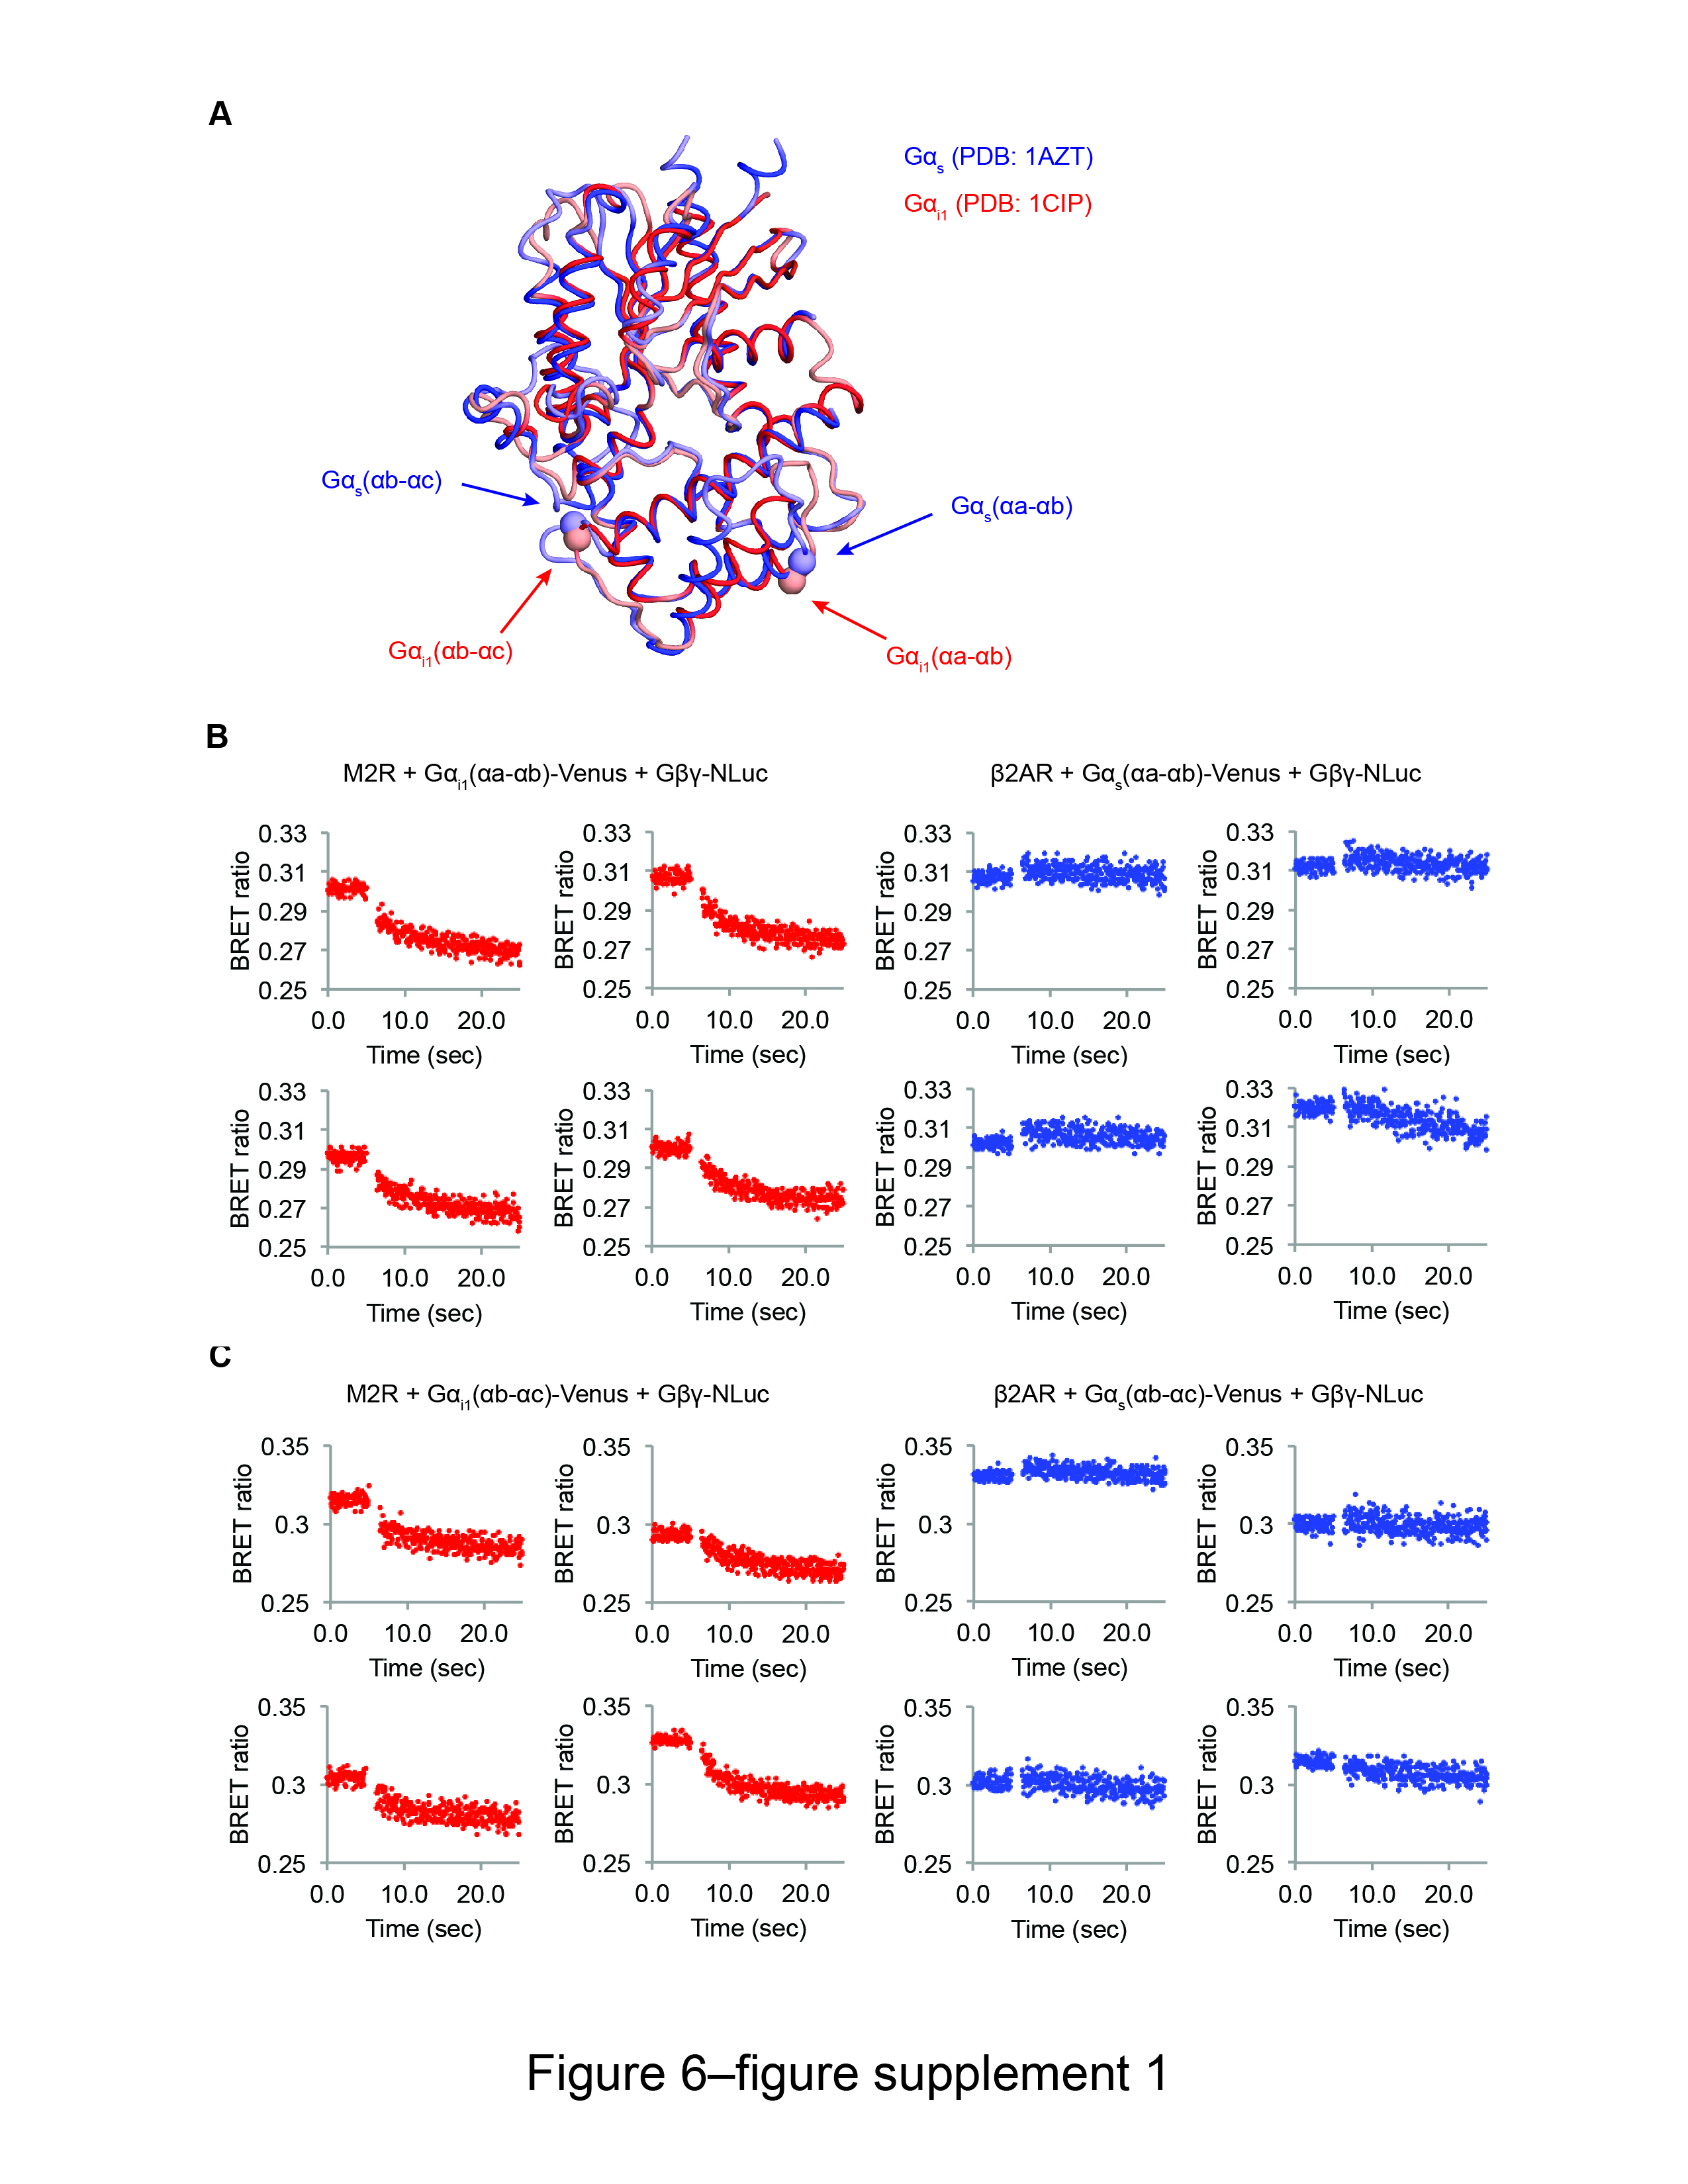

Supplement: supp [file elife-42908-supp-v1.zip › elife_poa_e42908_Figure_6_figure_supplement_1.jpg]

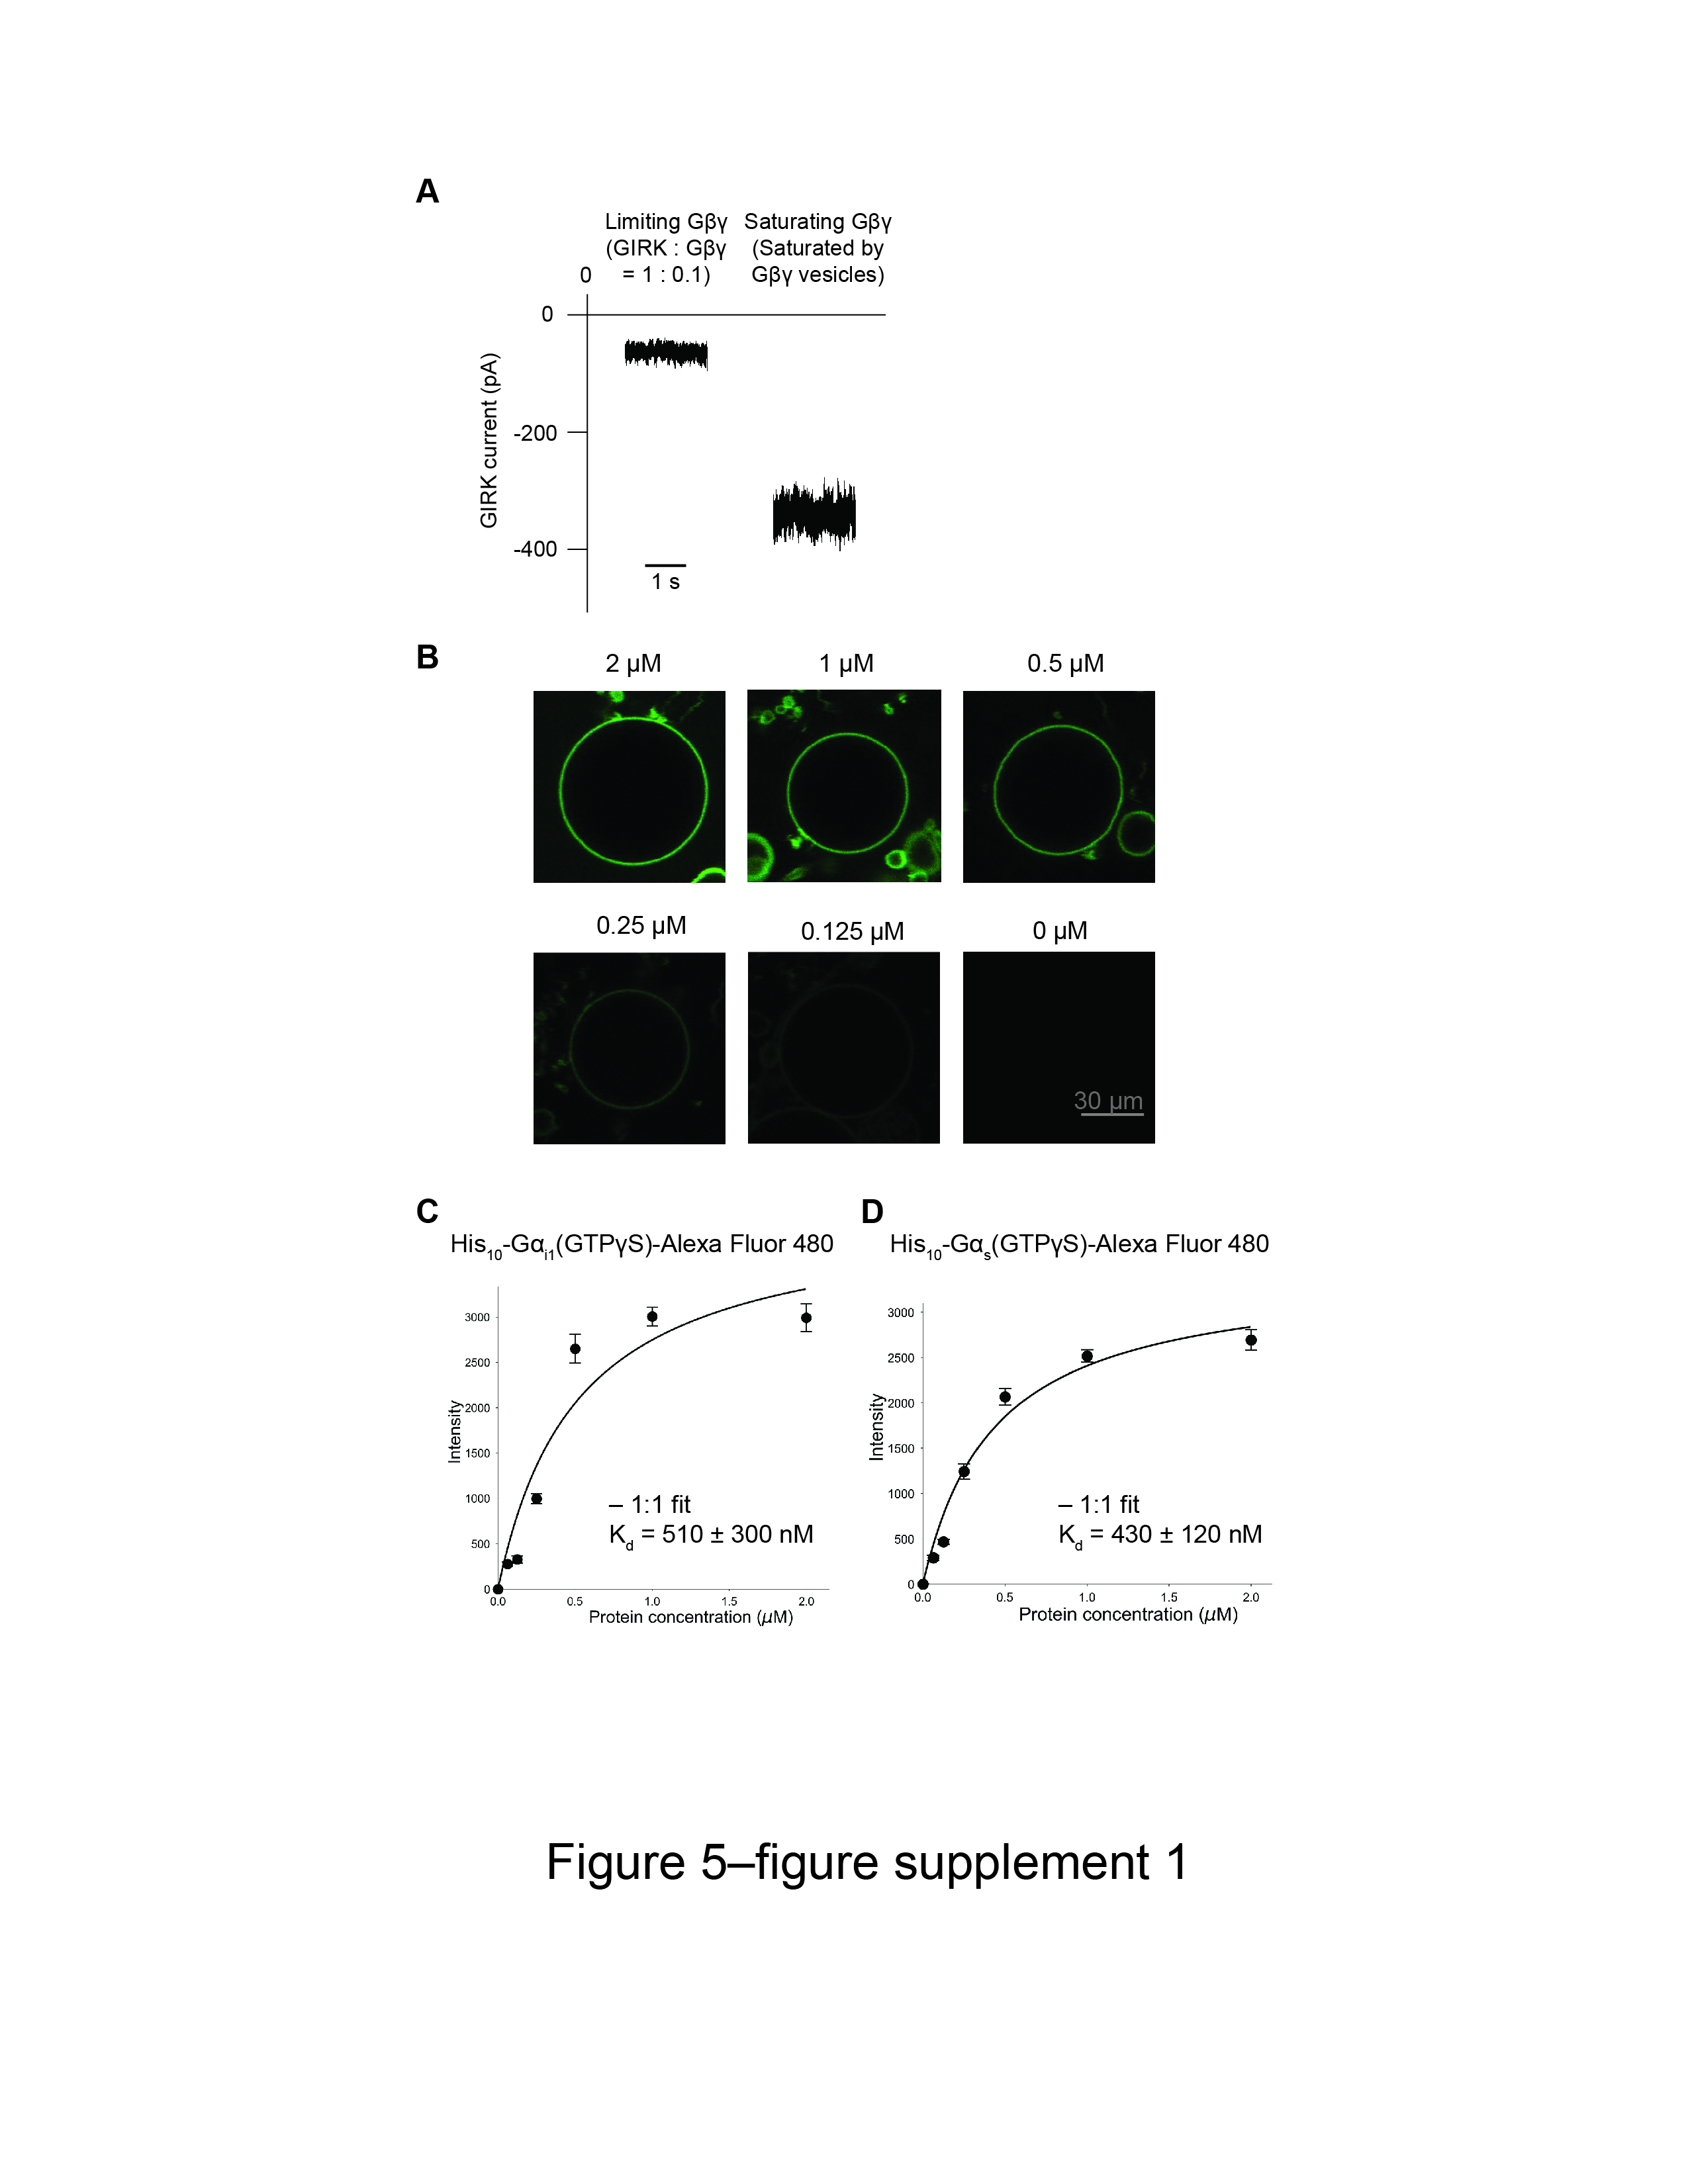

Supplement: supp [file elife-42908-supp-v1.zip › elife_poa_e42908_Figure_5_figure_supplement_1.jpg]

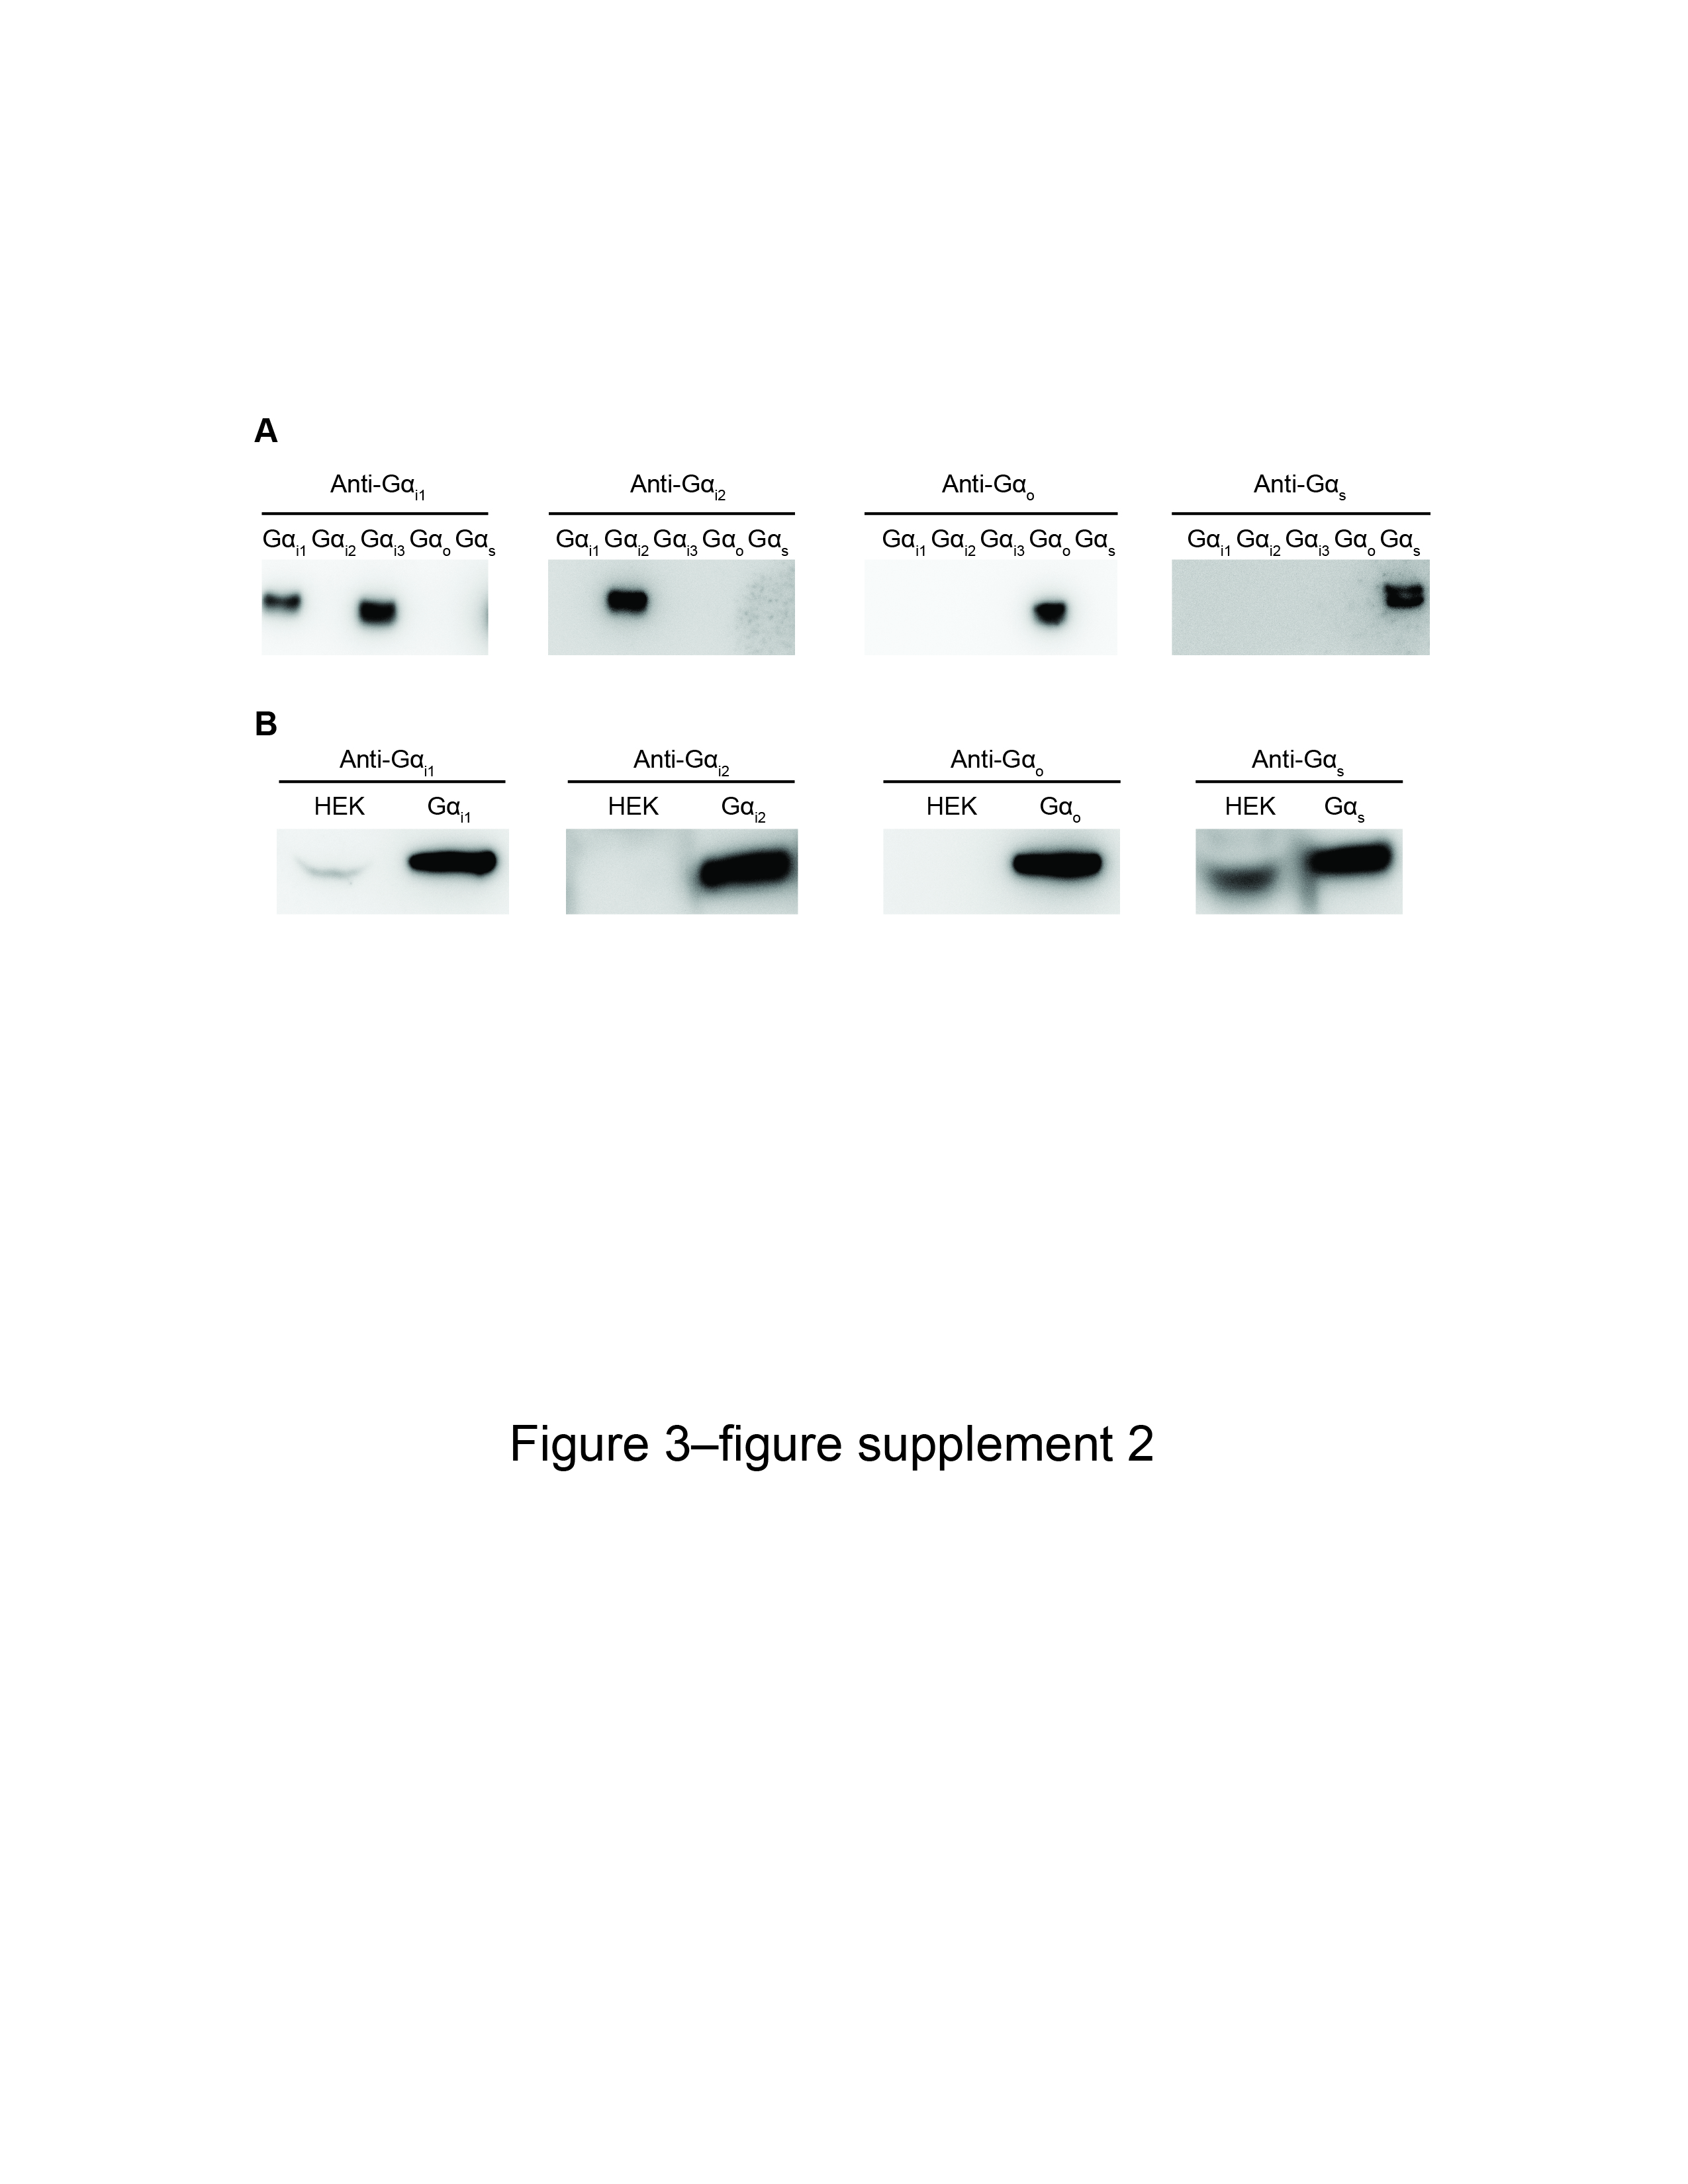

Supplement: supp [file elife-42908-supp-v1.zip › elife_poa_e42908_Figure_3_figure_supplement_2.jpg]

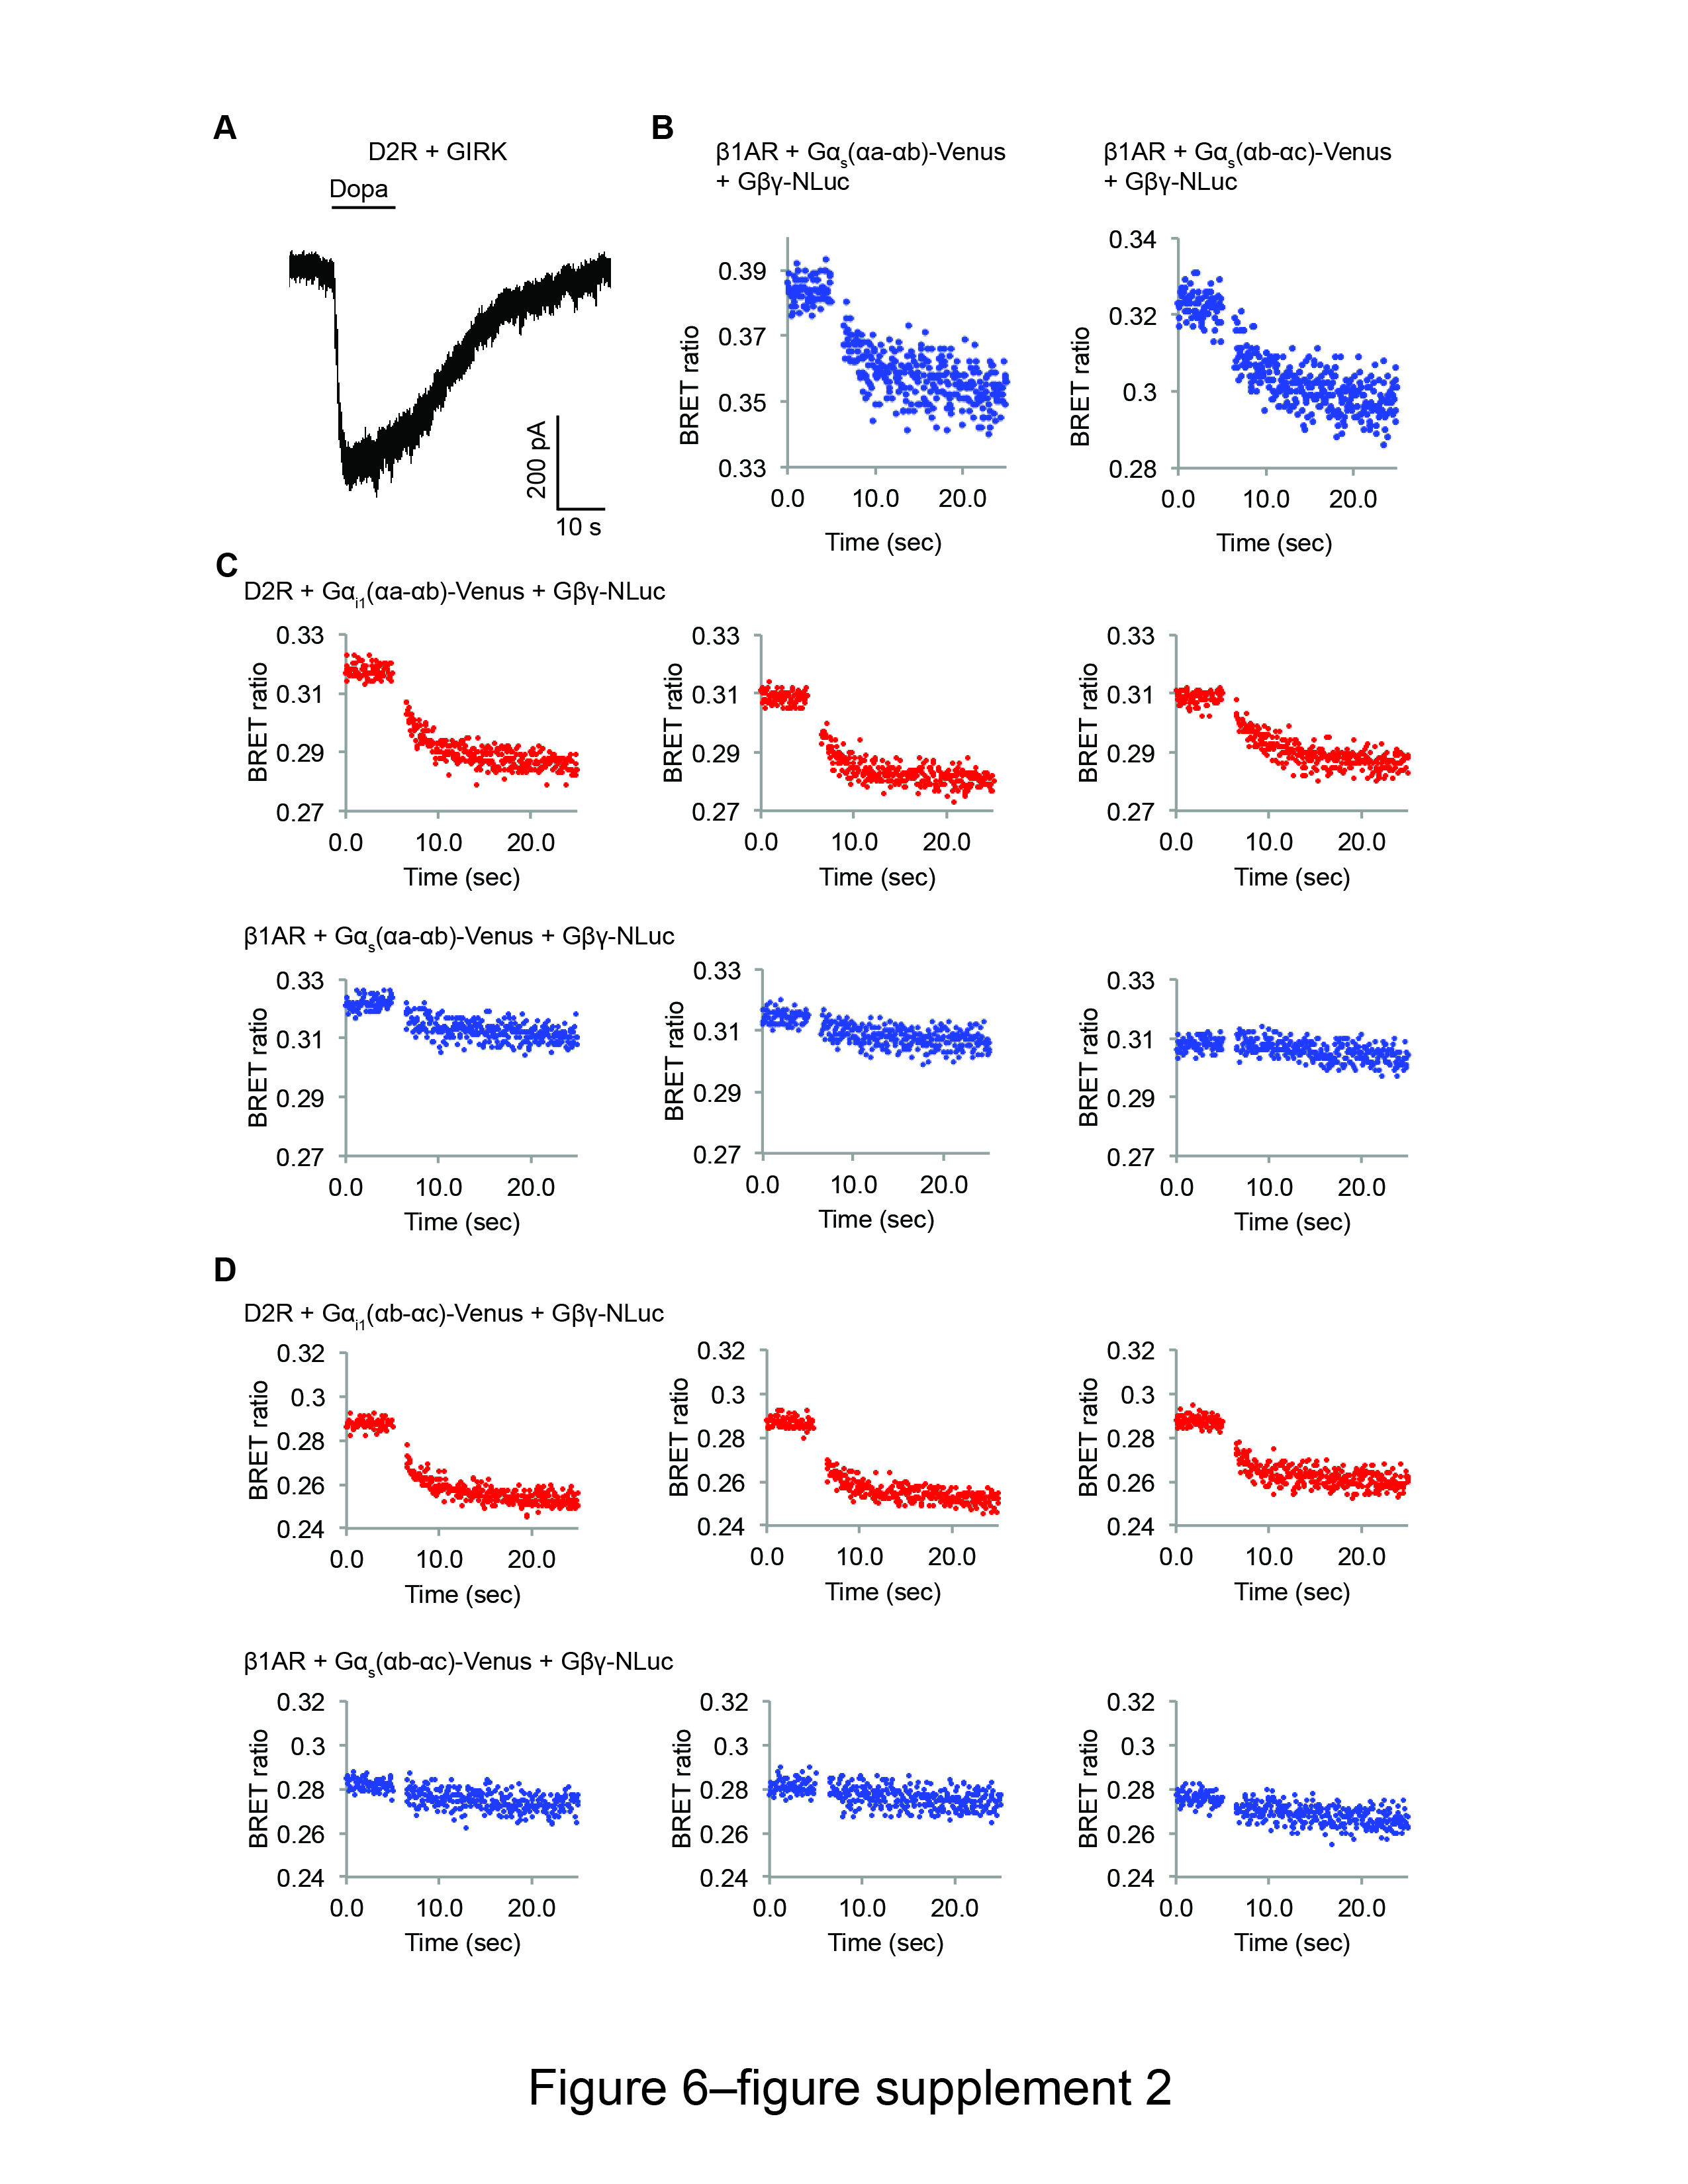

Supplement: supp [file elife-42908-supp-v1.zip › elife_poa_e42908_Figure_6_figure_supplement_2.jpg]

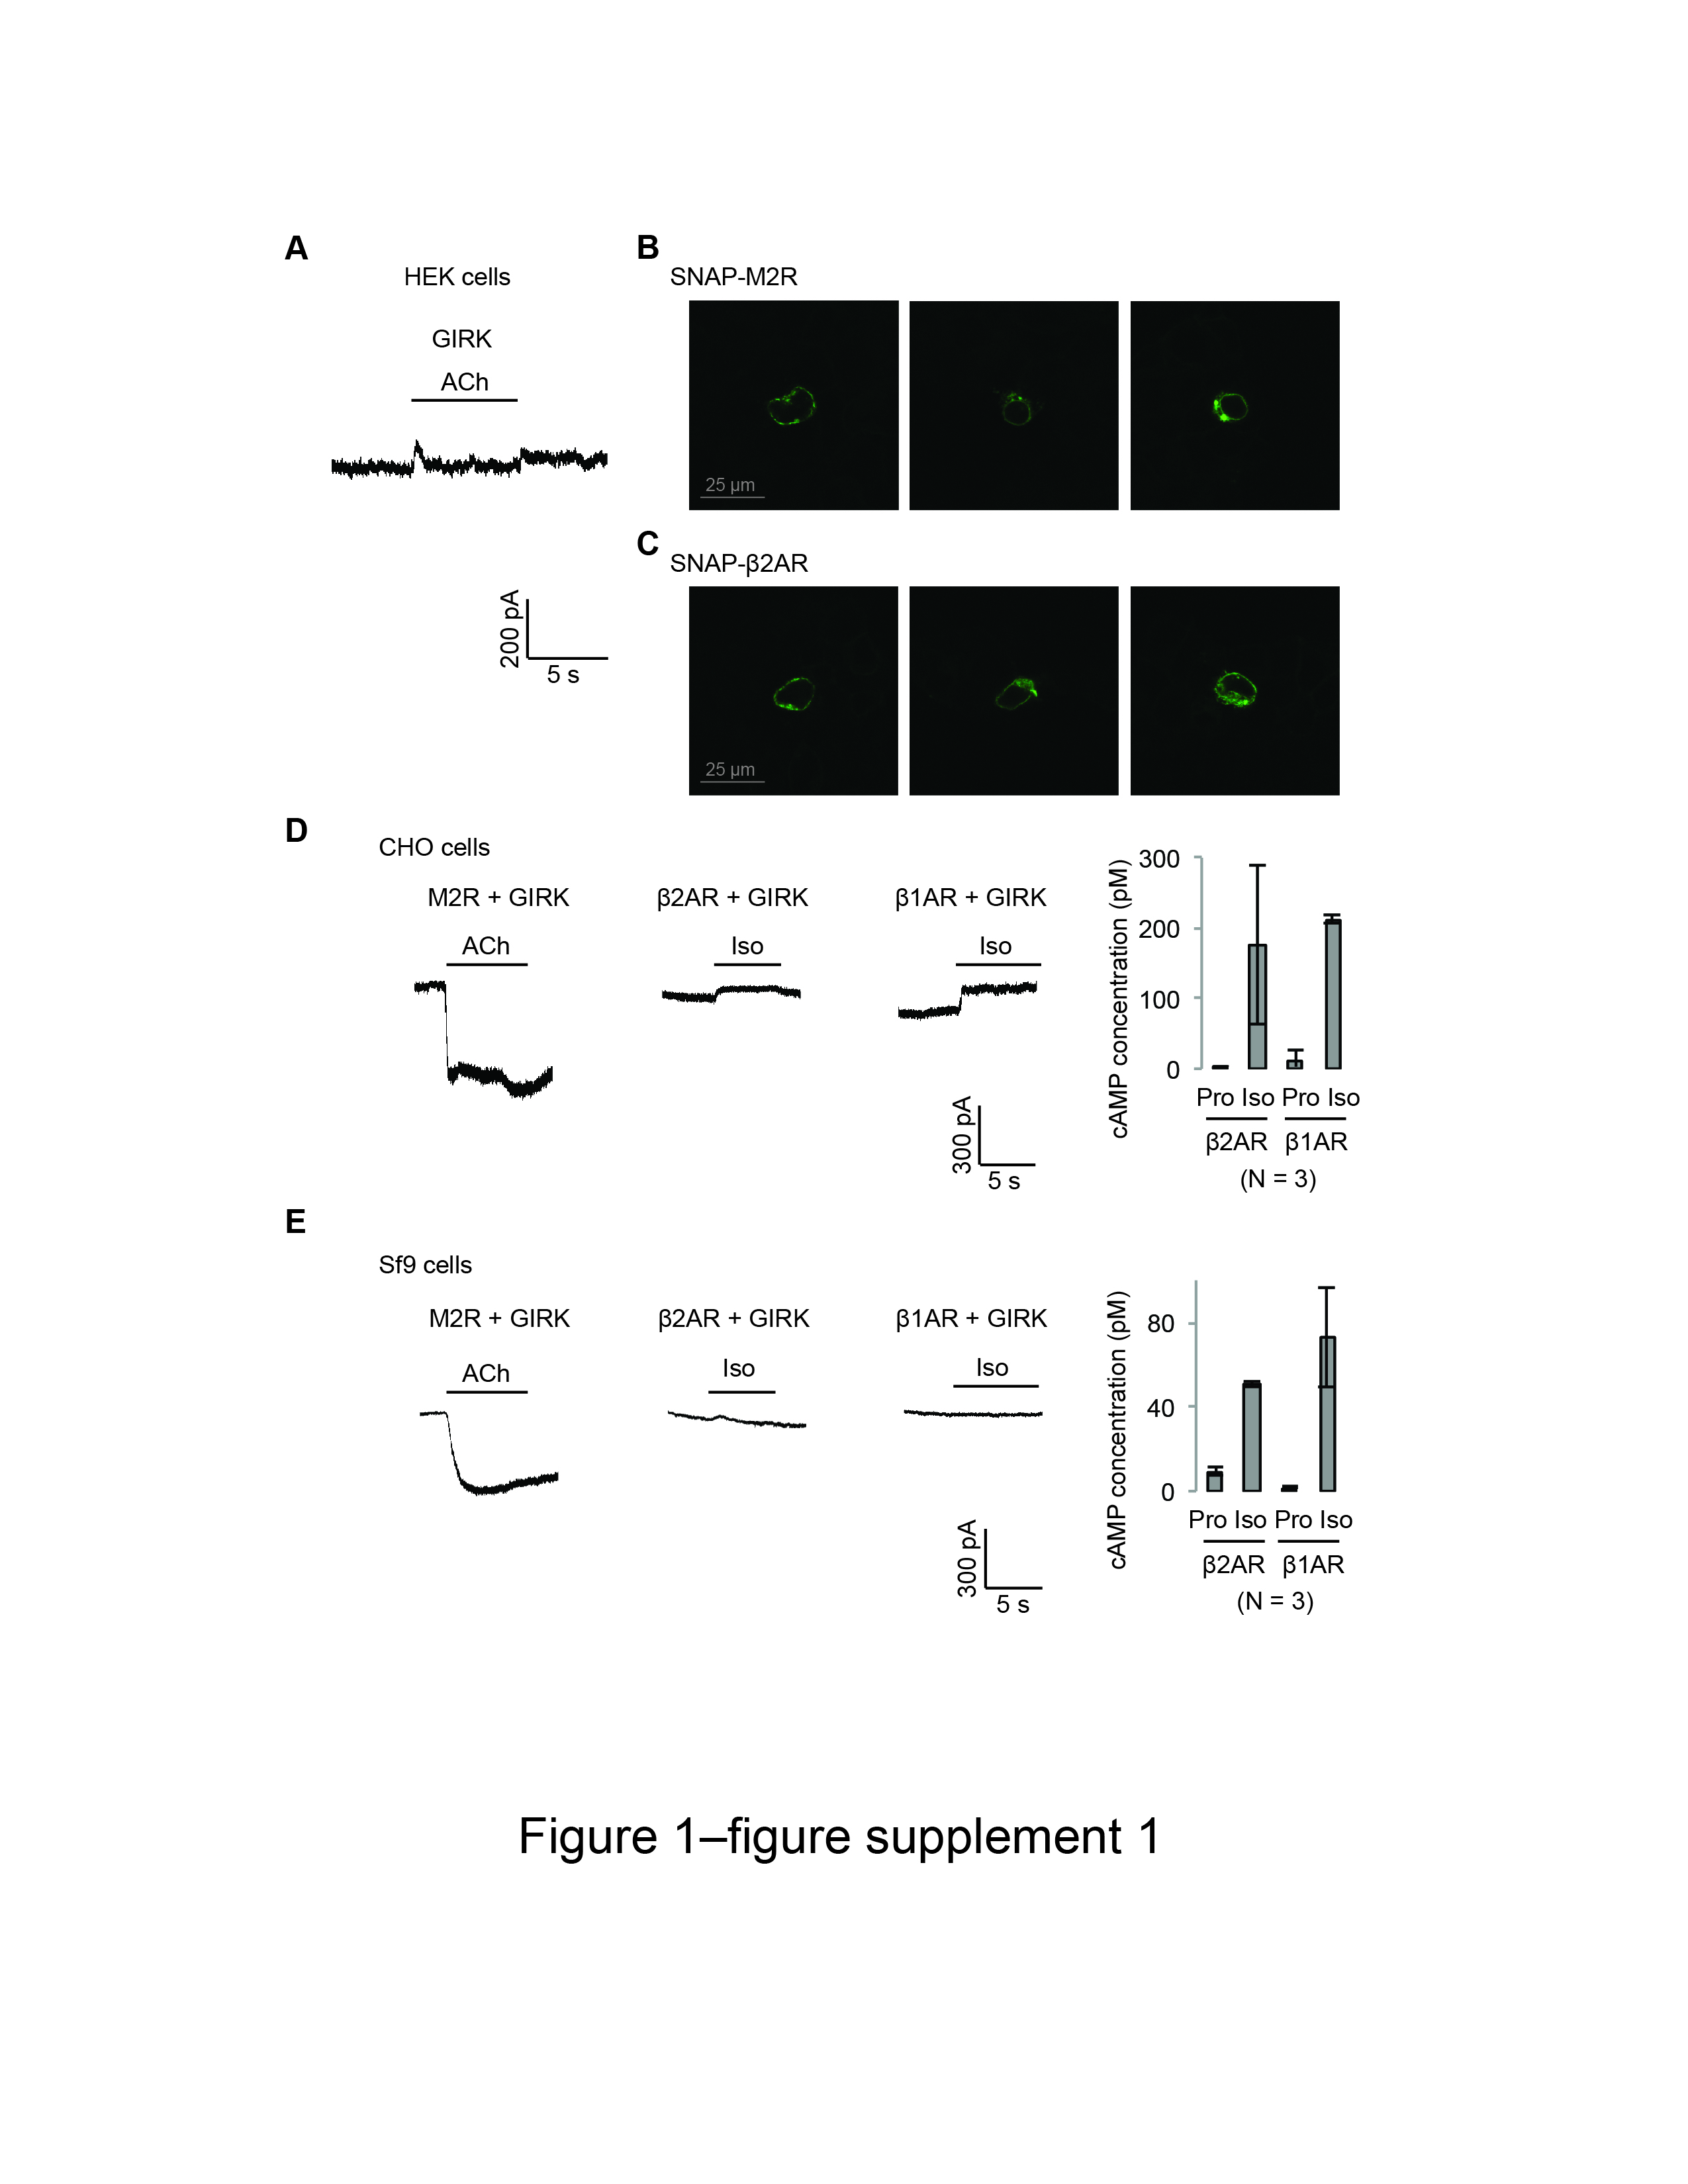

Supplement: supp [file elife-42908-supp-v1.zip › elife_poa_e42908_Figure_1_figure_supplement_1.jpg]
